# Supplementary material
Source: publisher figshare collection journal article supplement (https://tandf.figshare.com/articles/dataset/_/12347210)
Supplement: Supplementary file 1 [file 1]

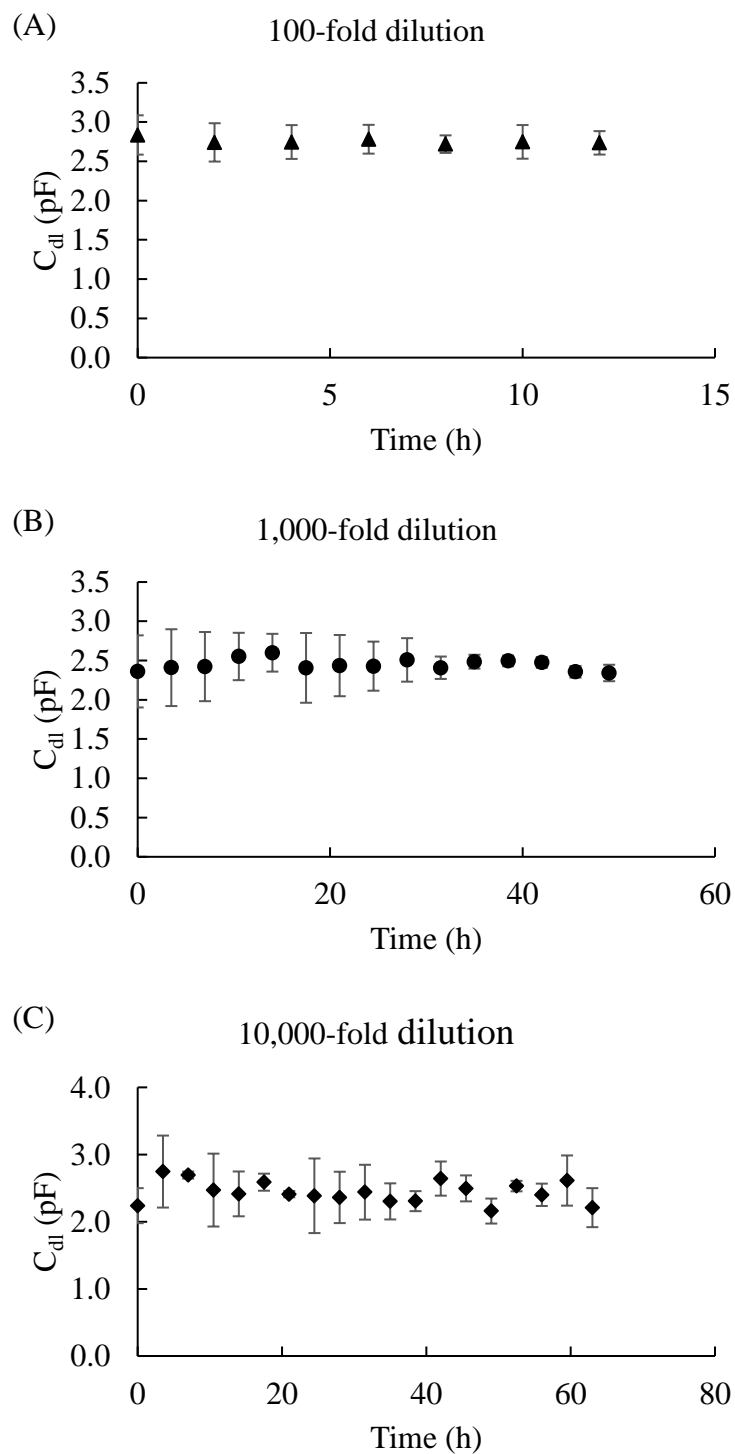

Fig. S3. The changes of the  $C_{dl}$  during the entire experiment time for 100-fold (A), 1,000-fold (B), and 10,000-fold (C) dilution experiments. Error bars represent the standard deviations.
