# Supplementary material
Source: publisher figshare collection journal article supplement (https://tandf.figshare.com/articles/dataset/_/12347210)
Supplement: Supplementary file 2 [file 1]

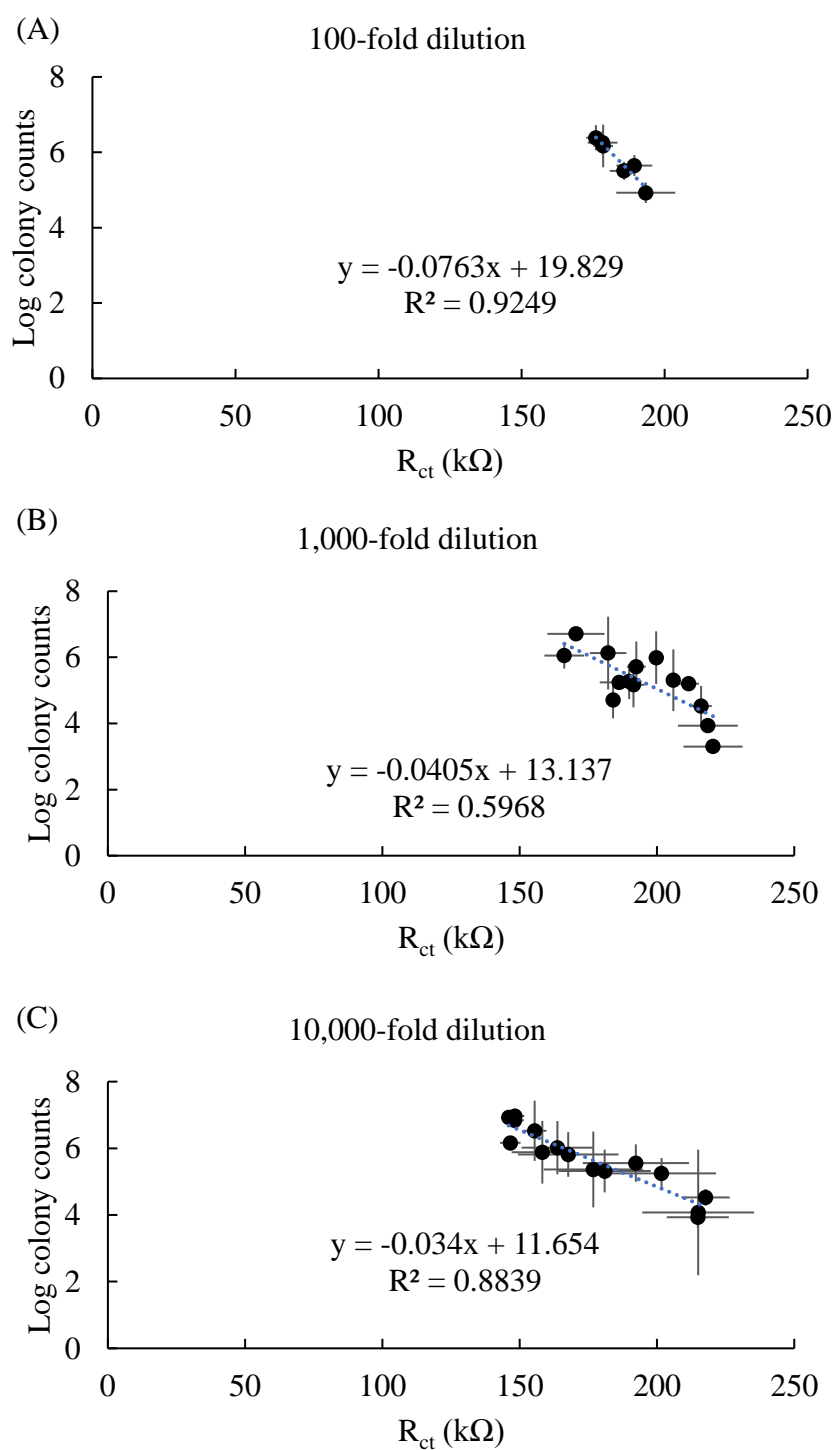

Fig. S4. The correlation between the log colony counts of biofilm (log CFU swab<sup>-1</sup>) and  $R_{ct}$  of the 100-fold (A), 1,000-fold (B), or 10,000-fold (C) dilution experiments. Linear regression was fitted with the model and  $R^2$ . Error bars represent the standard deviations.
