# Supplementary material
Source: publisher figshare collection journal article supplement (https://tandf.figshare.com/articles/dataset/_/12347210)
Supplement: Supplementary file 3 [file 1]

Archive with 6 entries (6 files):
- Supplemental Figure S1.pdf
- Supplemental Figure S2.pdf
- Supplemental Figure S3.pdf
- Supplemental Figure S4.pdf
- Supplemental Figure S5.pdf
- Supplemental Figure S6.pdf
