# Supplementary material
Source: publisher figshare collection journal article supplement (https://tandf.figshare.com/articles/dataset/_/12347210)
Supplement: Supplementary file 3 [file 1 › Supplemental Figure S2.pdf]

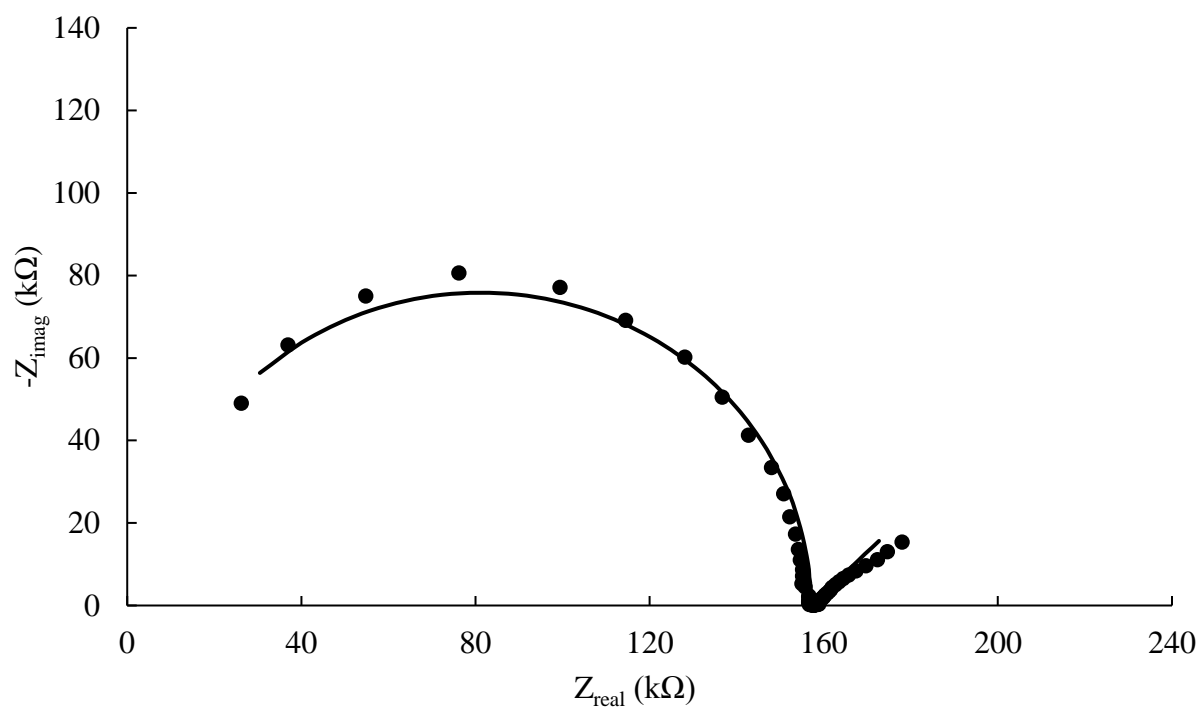

Fig. S2. An example of the fitted curve to the EIS measurement at 42 h in Fig. 5A using the Randles circuit model.
