# Supplementary material
Source: publisher figshare collection journal article supplement (https://tandf.figshare.com/articles/dataset/_/12347210)
Supplement: Supplementary file 3 [file 1 › Supplemental Figure S5.pdf]

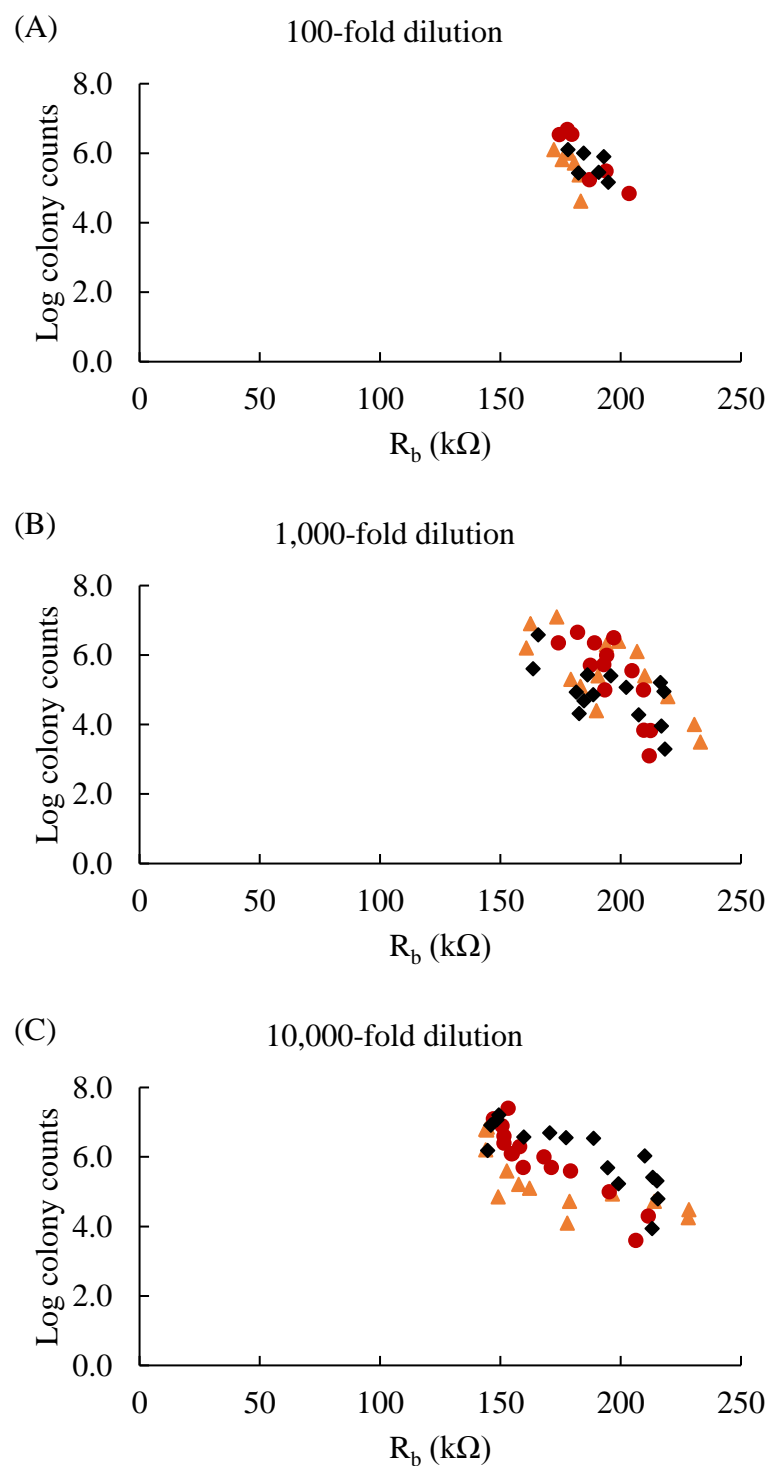

Fig. S5. The correlation between the log colony counts of biofilm (log CFU swab<sup>-1</sup>) and  $R_b$  of three replicates (◆, ●, and ▲) of the 100-fold (A), 1,000-fold (B), or 10,000-fold (C) dilution experiment (based on the biofilm model).
