# Supplementary material
Source: publisher figshare collection journal article supplement (https://tandf.figshare.com/articles/dataset/_/12347210)
Supplement: Supplementary file 3 [file 1 › Supplemental Figure S6.pdf]

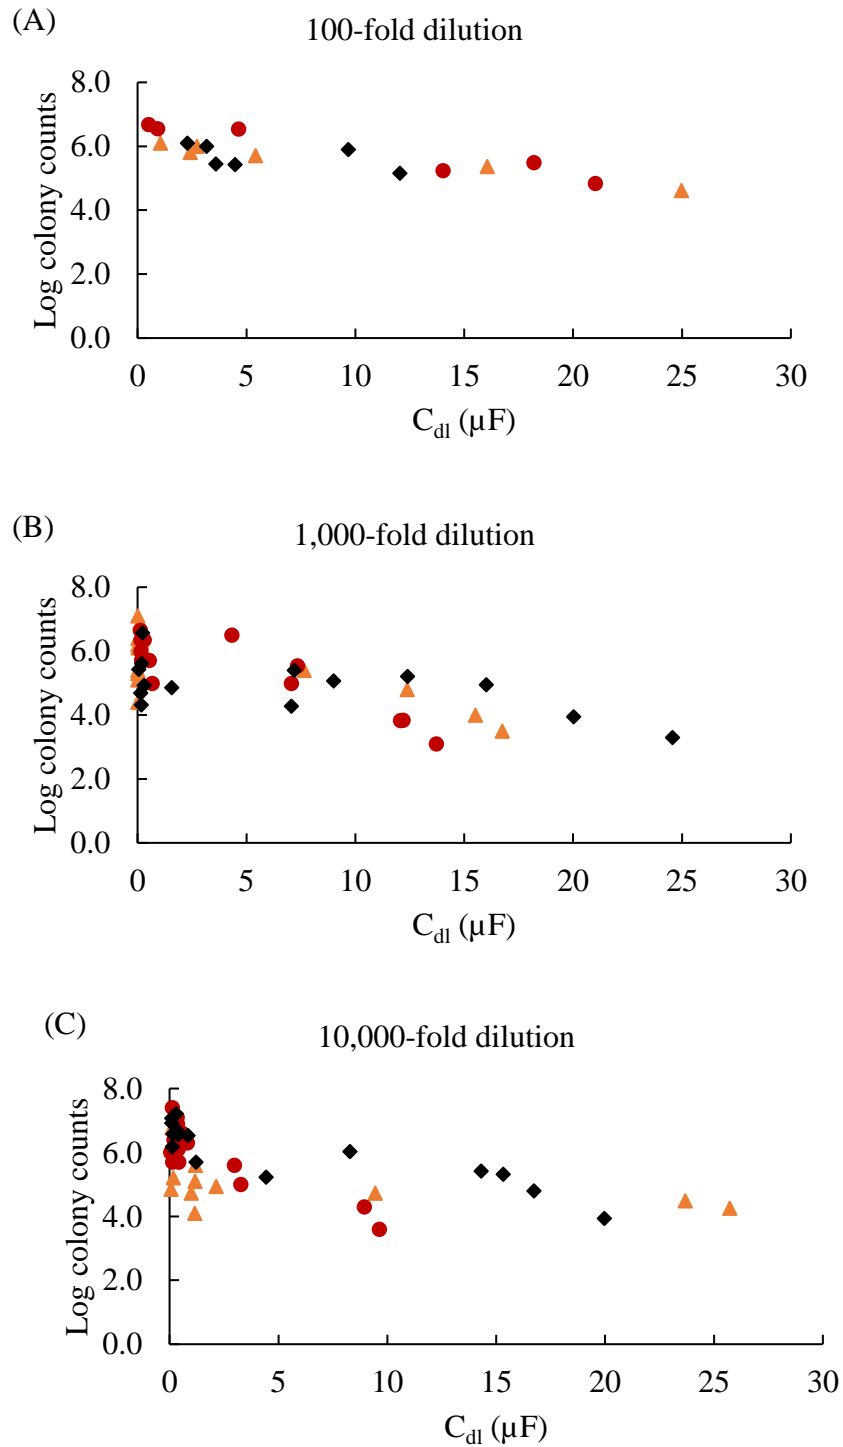

Fig. S6. The correlation between the log colony counts of biofilm ( $\log CFU \text{ swab}^{-1}$ ) and  $C_{dl}$  of three replicates ( $\blacklozenge$ ,  $\bullet$ , and  $\blacktriangle$ ) of the 100-fold (A), 1,000-fold (B), or 10,000-fold (C) dilution experiment (based on the biofilm model).
