# Supplementary material
Source: publisher figshare collection journal article supplement (https://tandf.figshare.com/articles/dataset/_/12347210)

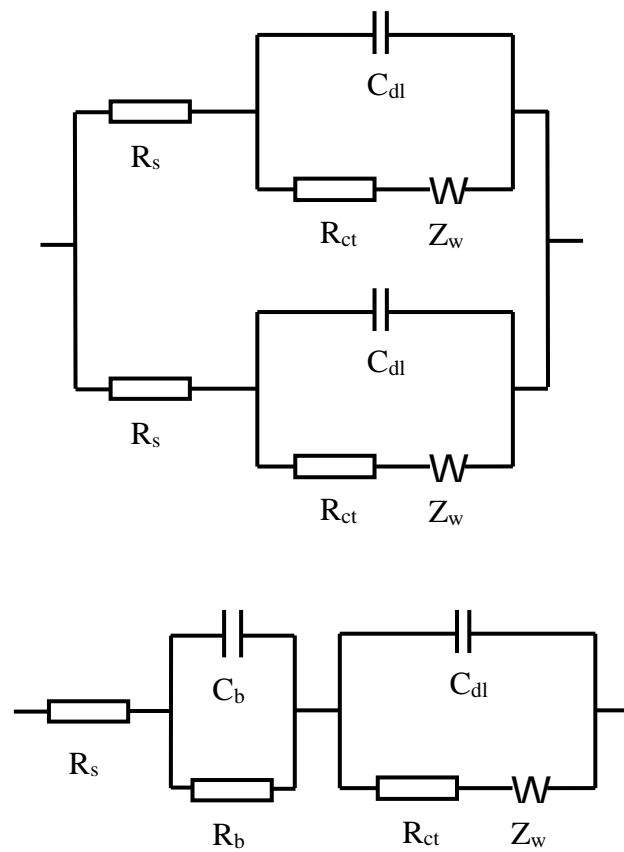

Fig. S1. Examples of the equivalent circuit models that did not work.

Supplement: Supplementary file 3 [file 1 › Supplemental Figure S1.pdf]
